# Supplementary material
Source: Springer Nature journal article supplement (https://www.springermedizin.de/resource/supplementary/12967_2007_221_MOESM5_ESM.pdf/9575976)

**A**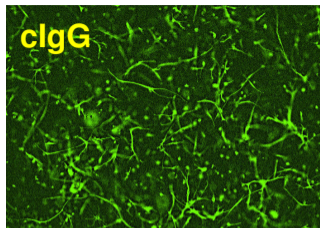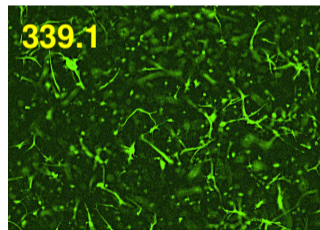**B**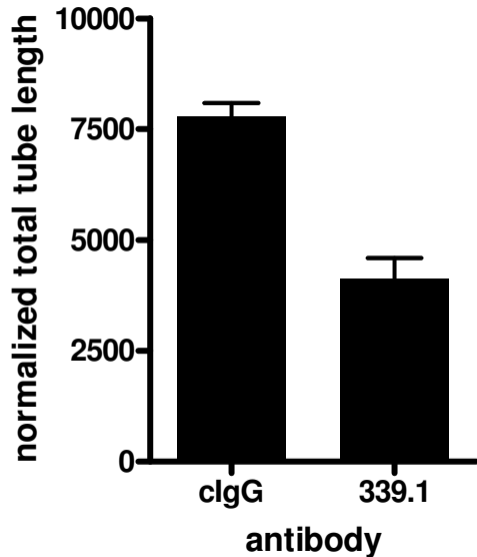

Supplement: MOESM5 [file 9575976]
